# Supplementary material
Source: publisher site journal article supplement (https://www.dovepress.com/article/219324)
Supplement: Supplementary file 1 [file get_supplementary_file.php]

**Supplemental Table 1: ICD-9-CM and ICD-10 codes used to identify opioid overdose**

|                                                                                                    |
|----------------------------------------------------------------------------------------------------|
| • 965.00: Poisoning by opium (alkaloids), unspecified;                                             |
| • 965.02: Poisoning by methadone;                                                                  |
| • 965.09: Poisoning by other opioids and related narcotics;                                        |
| • E850.1: Accidental poisoning by methadone; and                                                   |
| • E850.2: Accidental poisoning by other opiates and related narcotics.                             |
| • T40.0: Poisoning by opium                                                                        |
| • T40.2: Poisoning by other opioids                                                                |
| • T40.3: Poisoning by methadone                                                                    |
| • T40.4: Poisoning by other synthetic narcotic                                                     |
| • X42: Accidental poisoning by and exposure to narcotics and psychodysleptics, not elsewhere       |
| • X62: Intentional self-poisoning by and exposure to narcotics and psychodysleptics, not elsewhere |
| • Y12: Undetermined poisoning by and exposure to narcotics and psychodysleptics, not elsewhere     |

Modification; ICD-10-CM, International Classification of Diseases, Tenth Revision, Clinical Modification.
